# Supplementary material
Source: PubMed Central journal article supplement (PMC7048004)

Full unedited gel for Figure 4A

P-mTOR

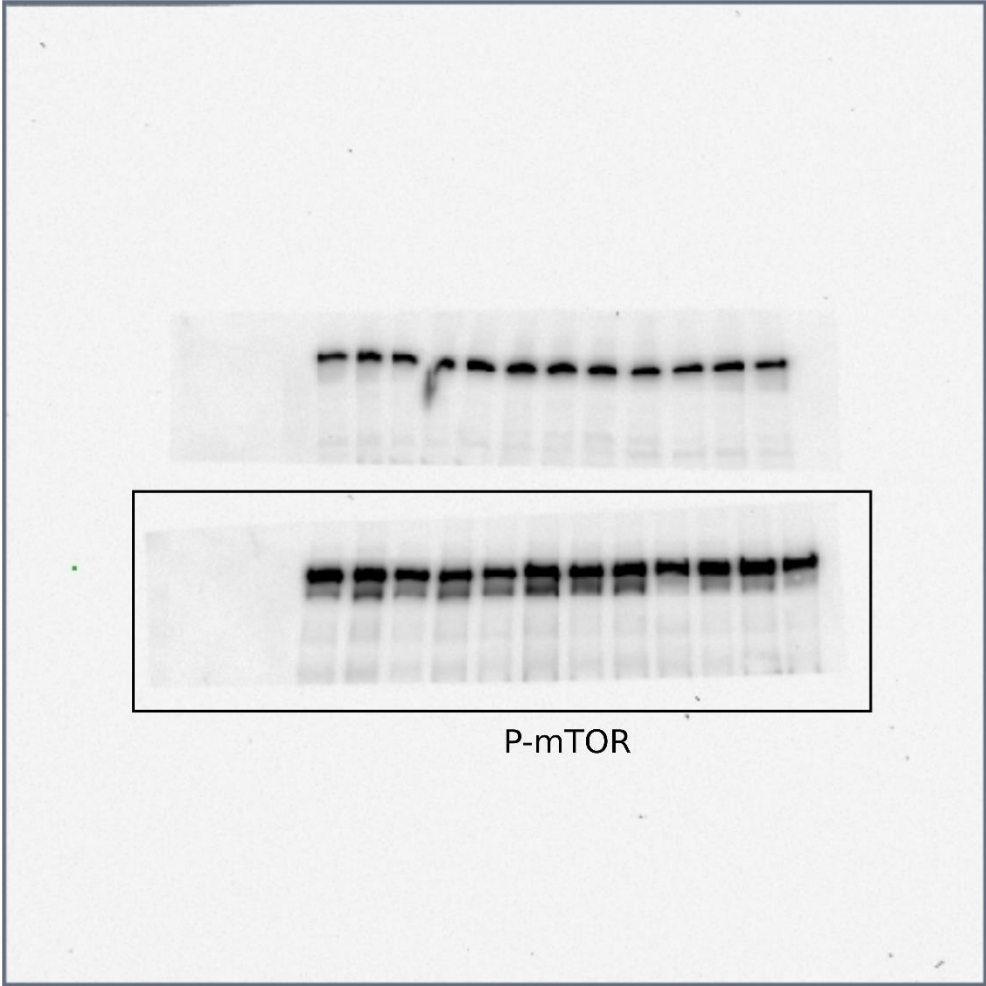

Full unedited gel for Figure 4A

mTOR and AMPK

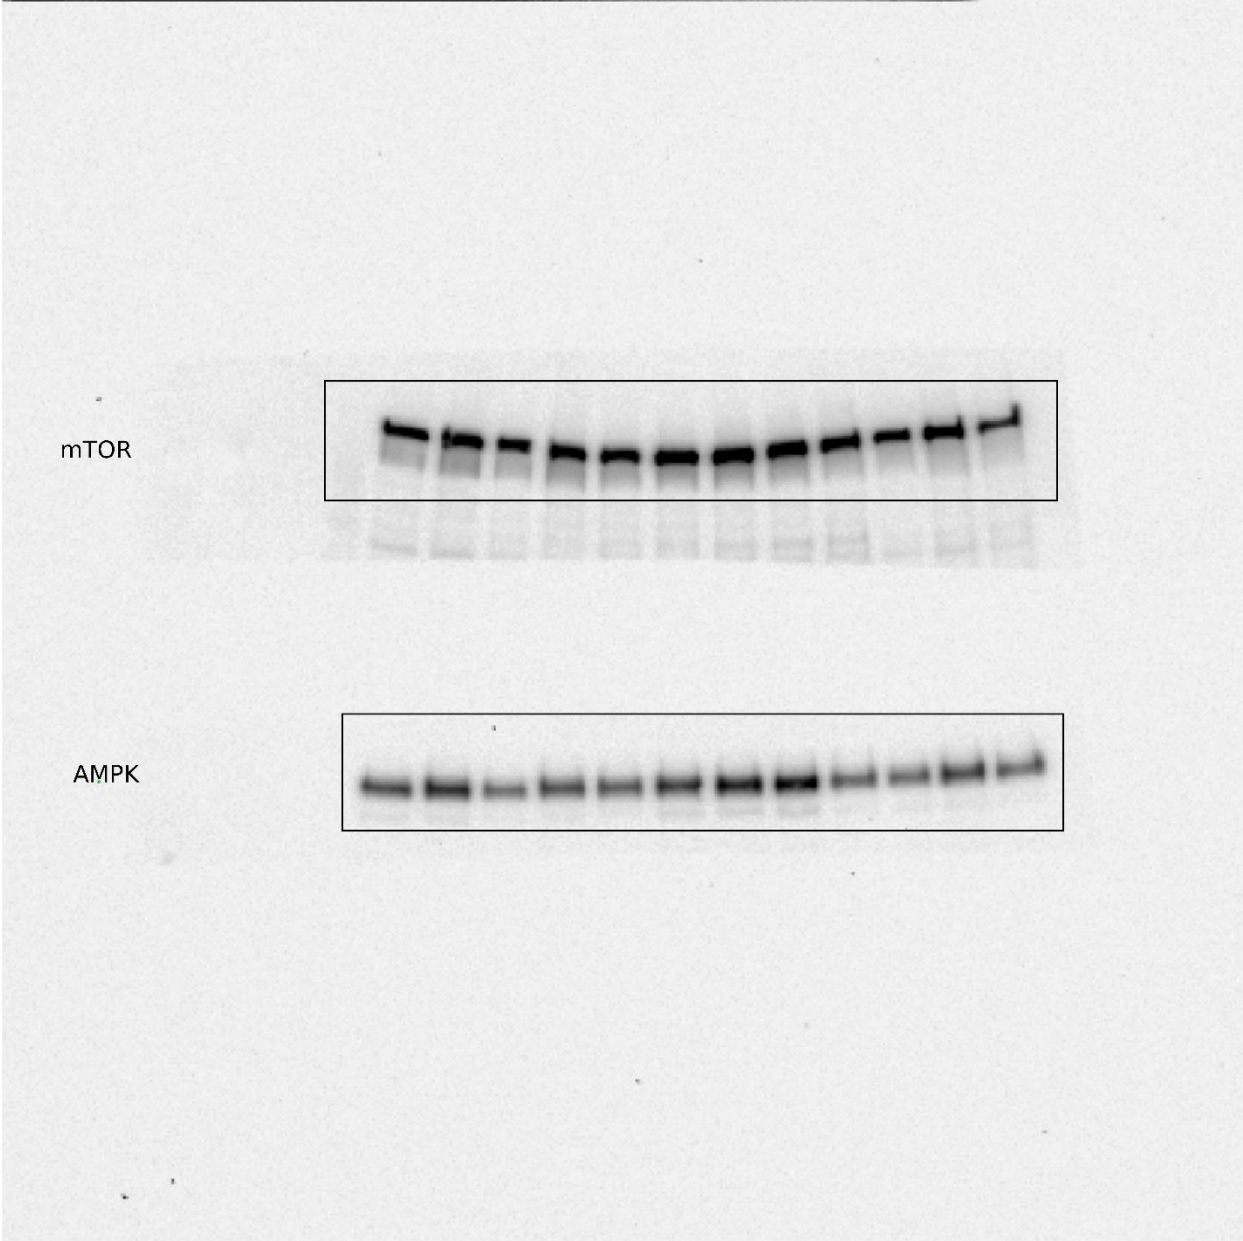

Full unedited gel for Figure 4A

P-AMPK

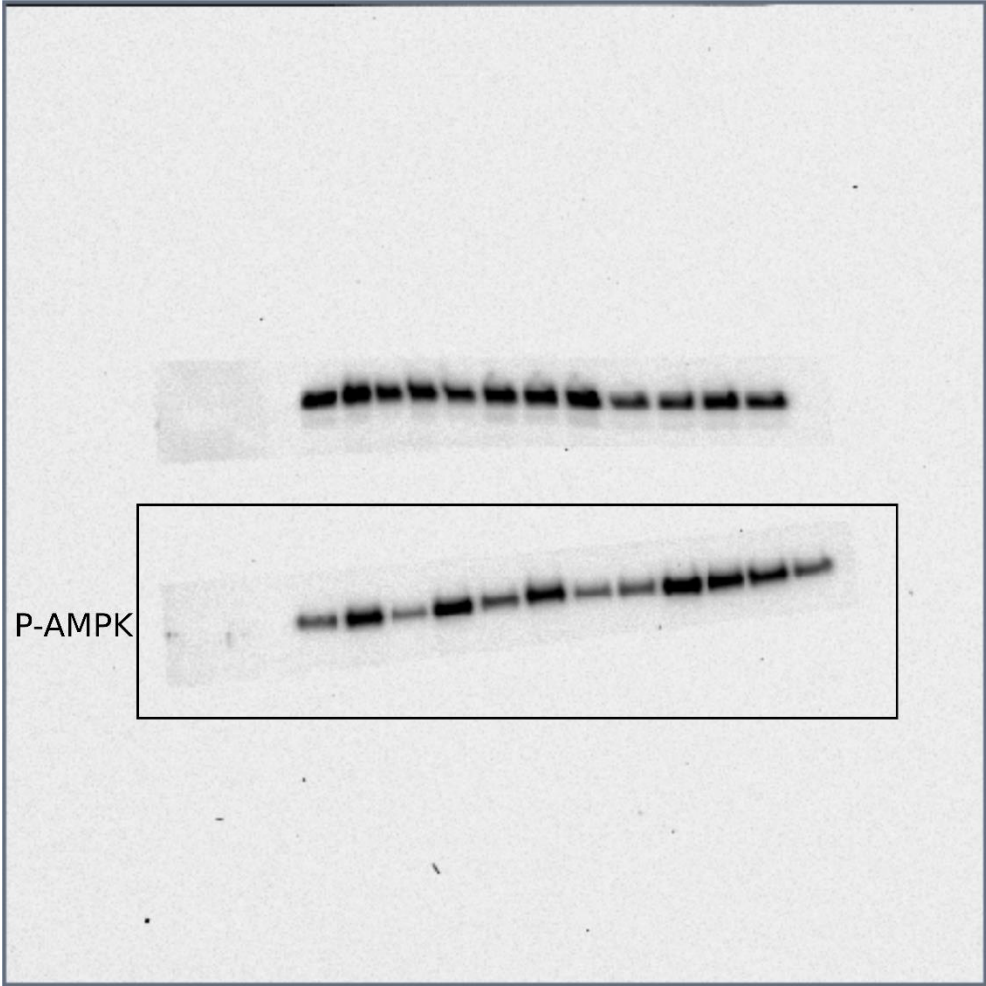

Full unedited gel for Figure 4A

GAPDH

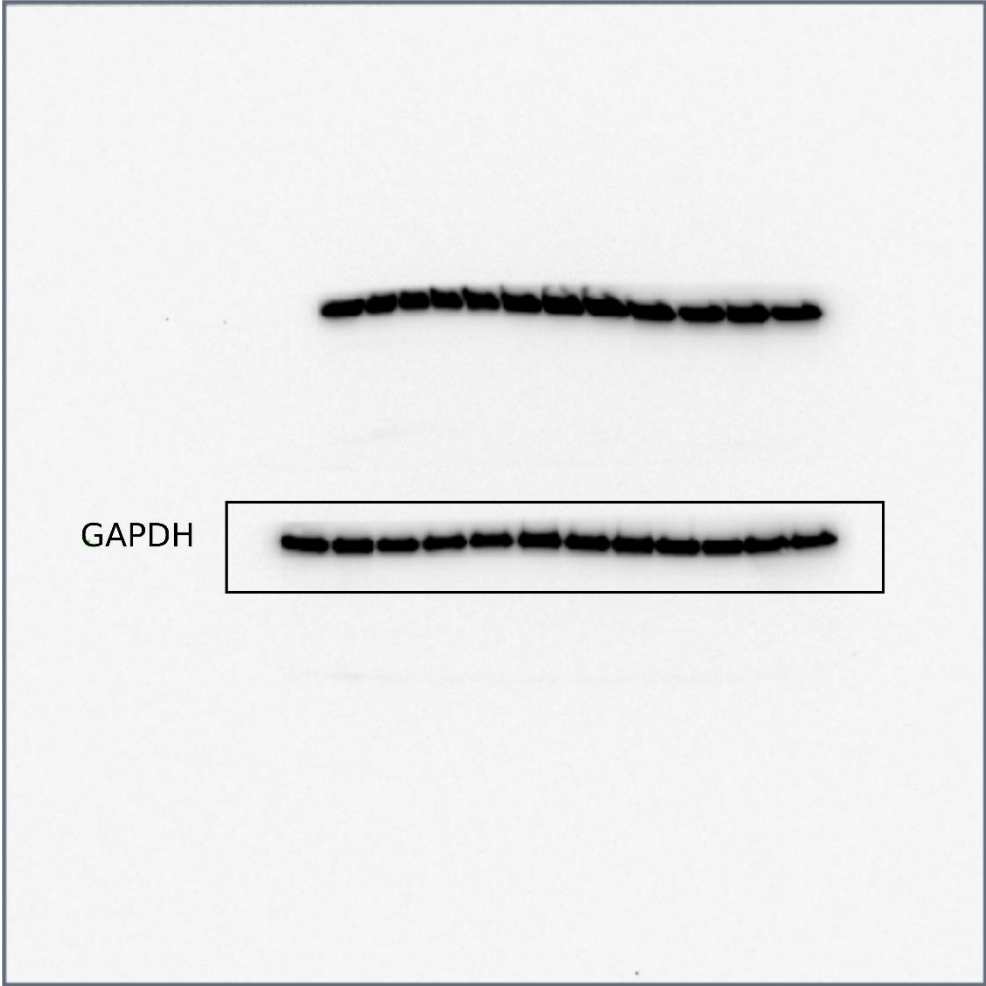

Full unedited gel for Figure 4B

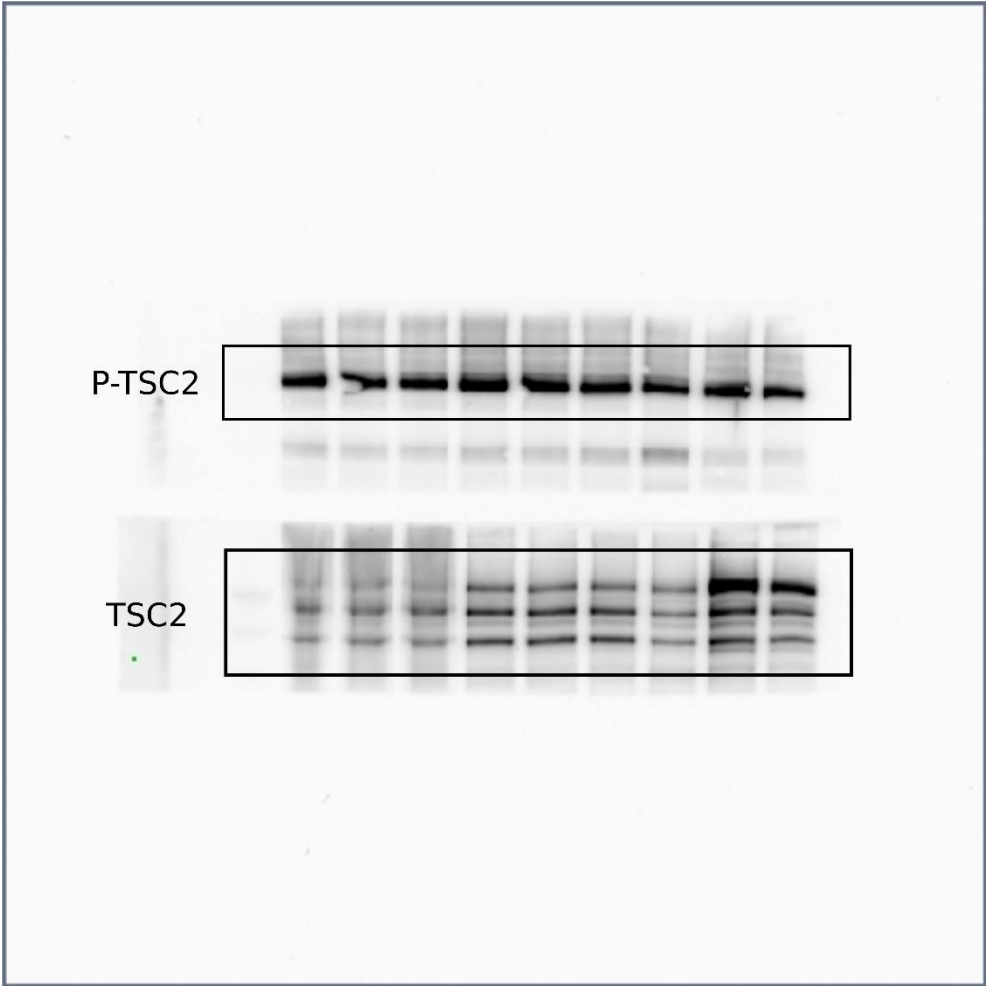

Full unedited gel for Figure 4B

GAPDH

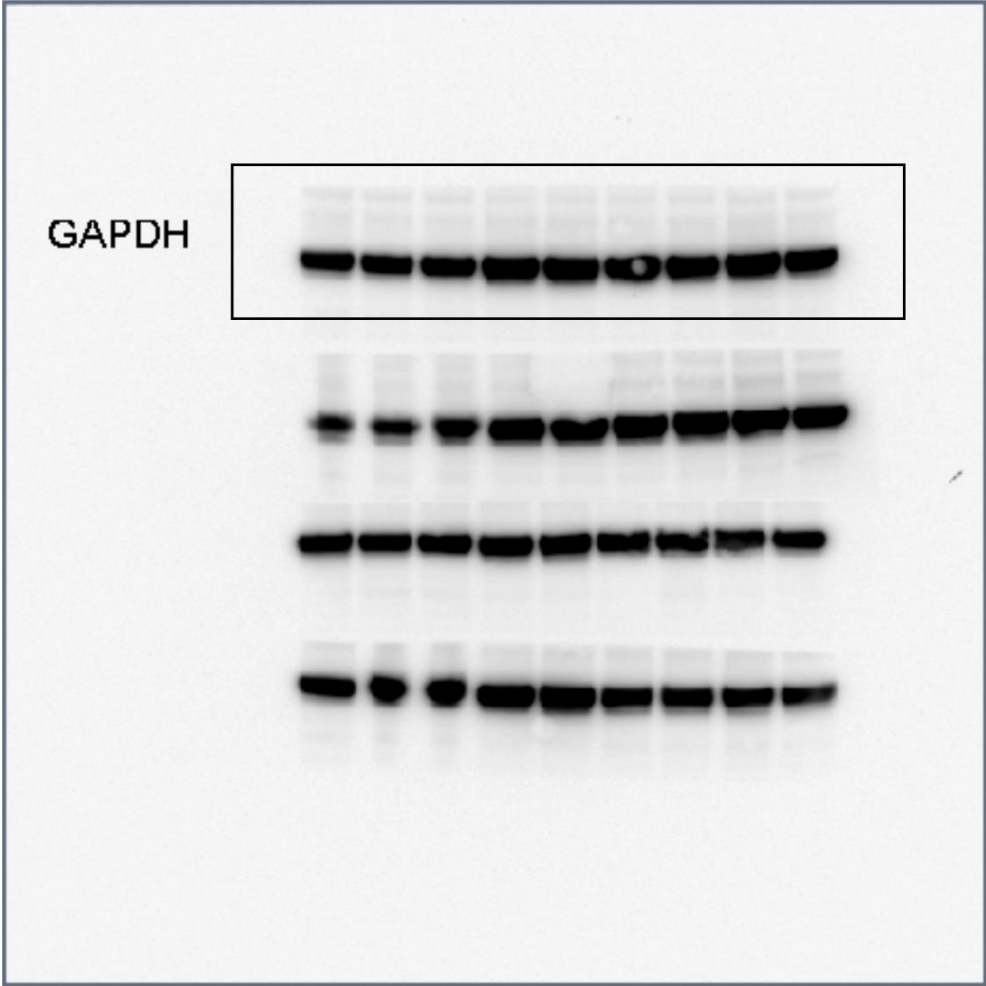

**Full unedited gel for Figure 4D**

**CoIP: mTOR**

**IB: mTOR**

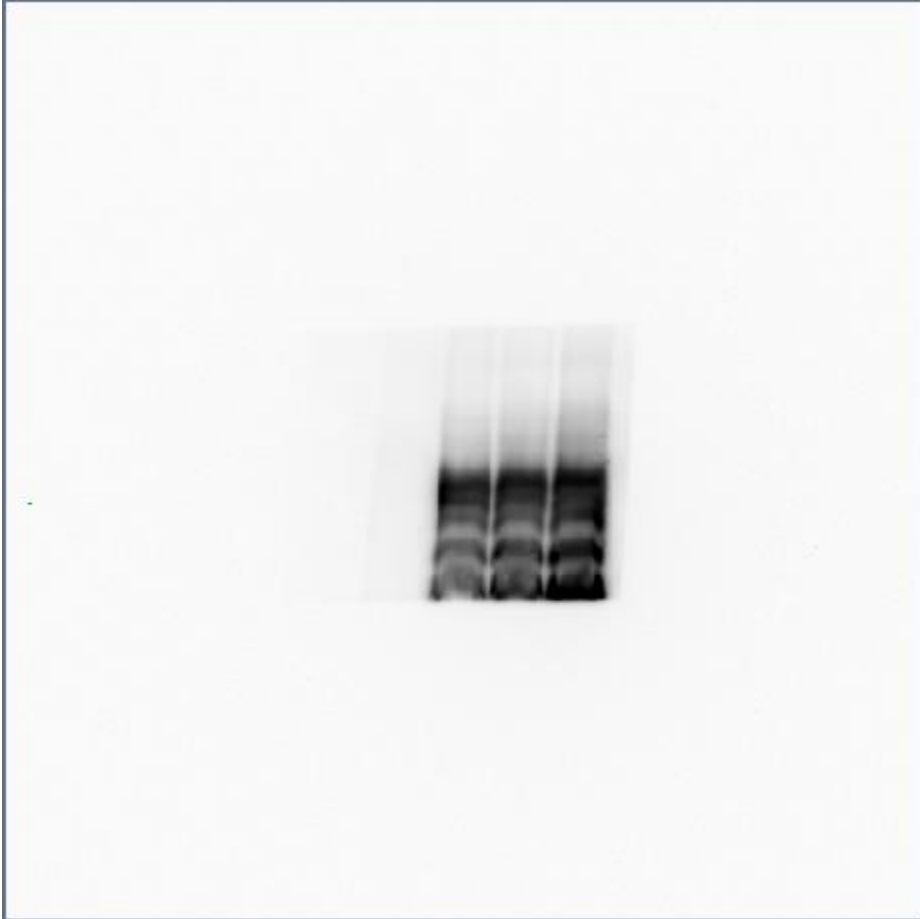

**Full unedited gel for Figure 4D**

**CoIP: mTOR**

**IB: HKII**

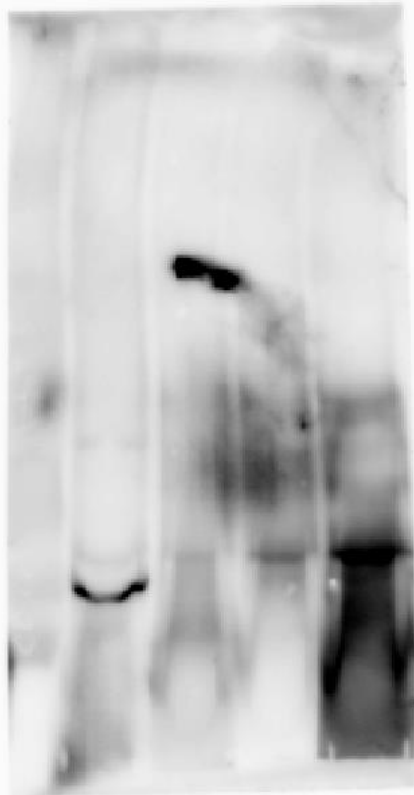



Full unedited gel for Figure 4D

Input

mTOR

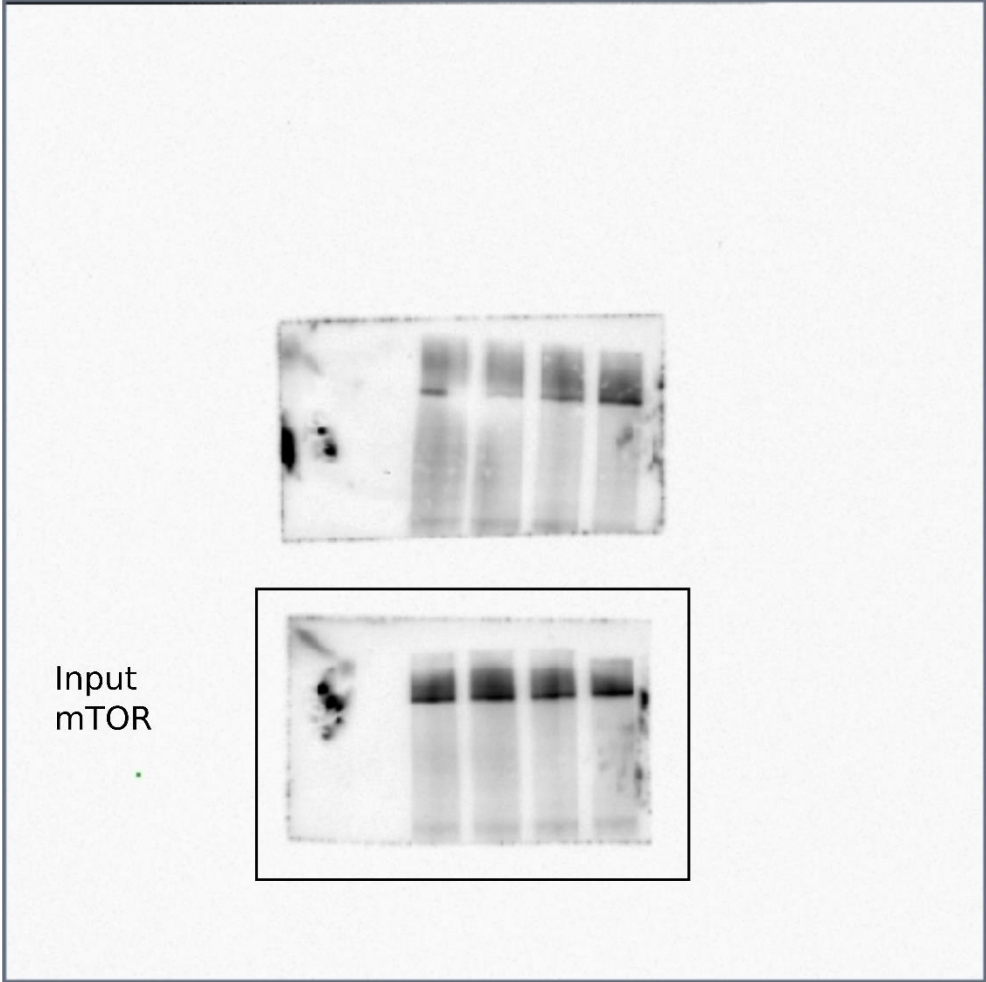

**Full unedited gel for Figure 4D**

**Input**

**HKII**

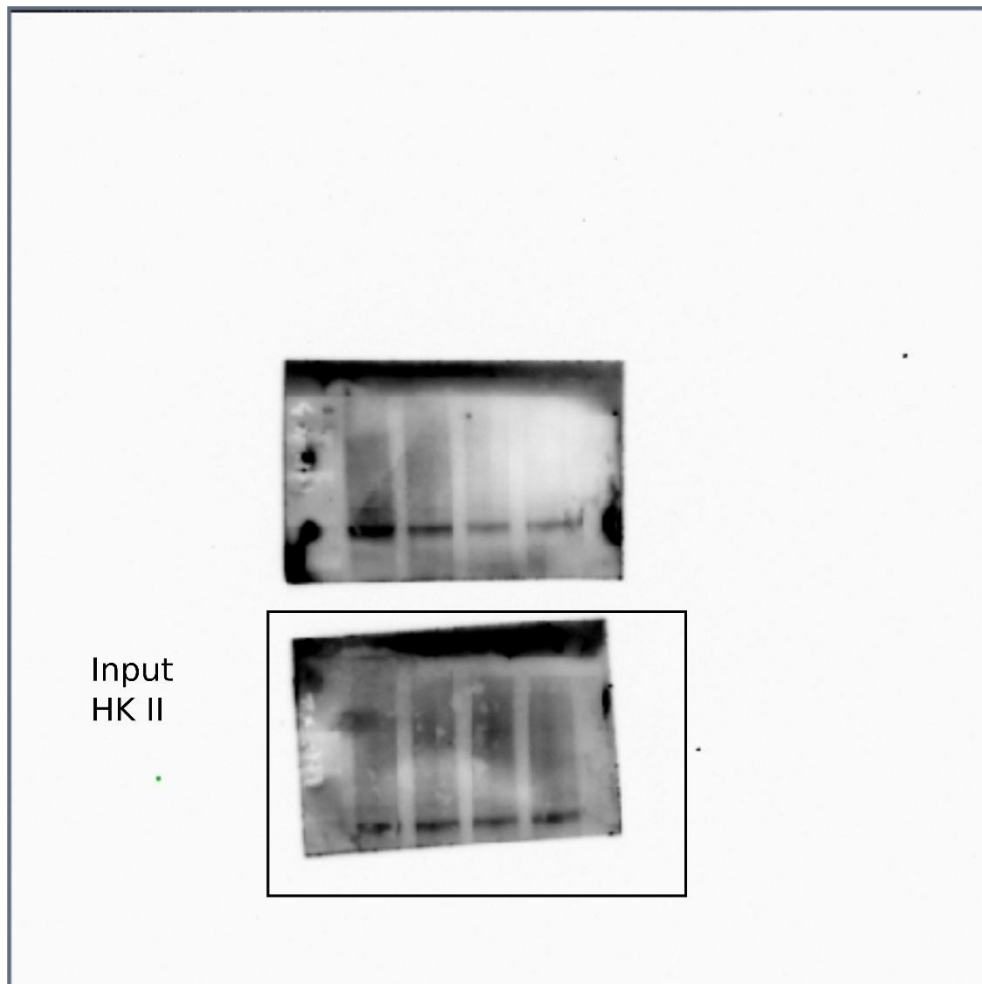

Full unedited gel for Figure 4D

Input

GAPDH

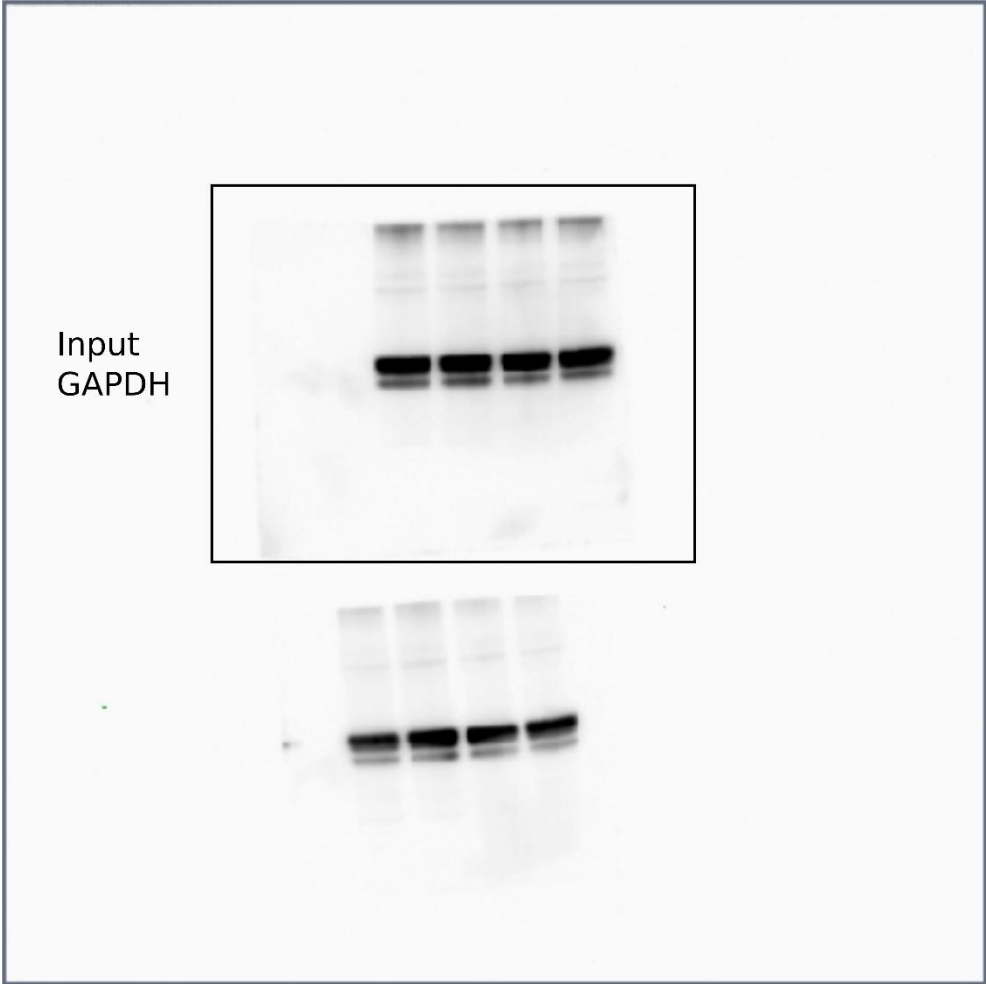

Full unedited gel for Figure 8A

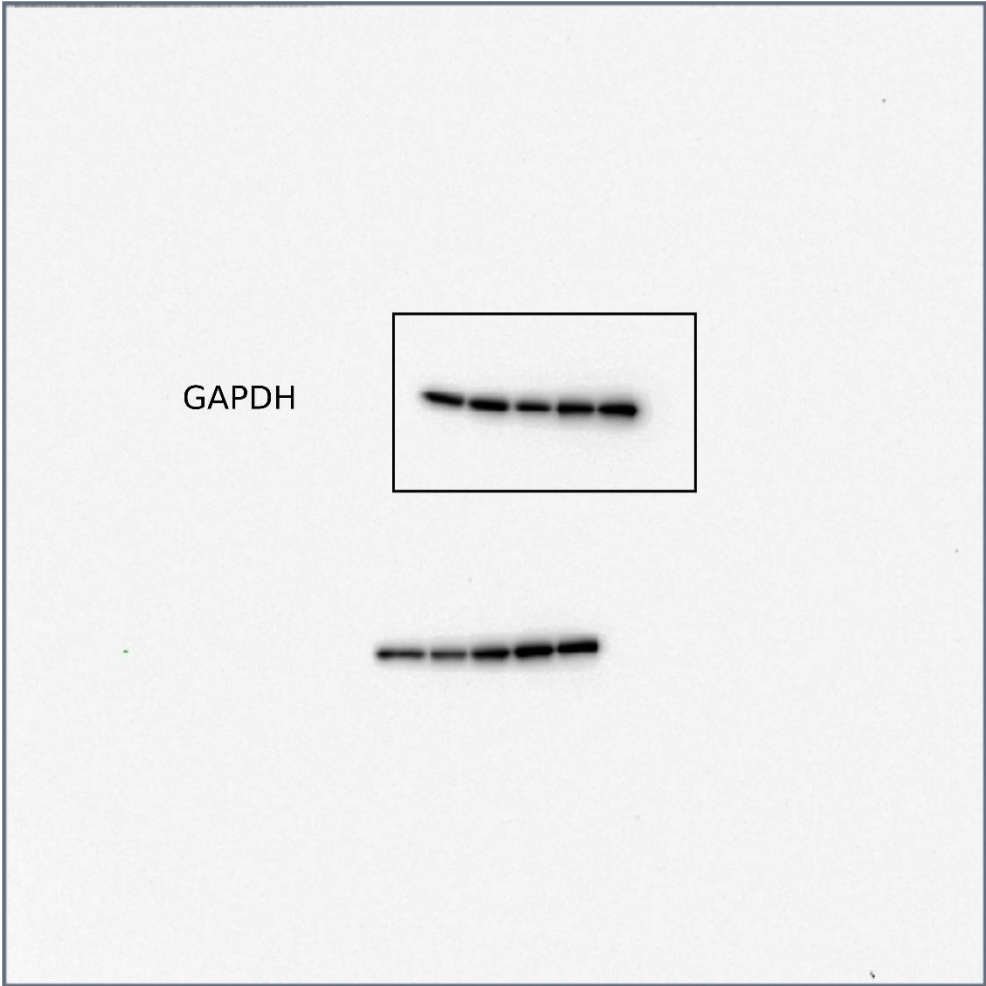

Full unedited gel for Figure 8A

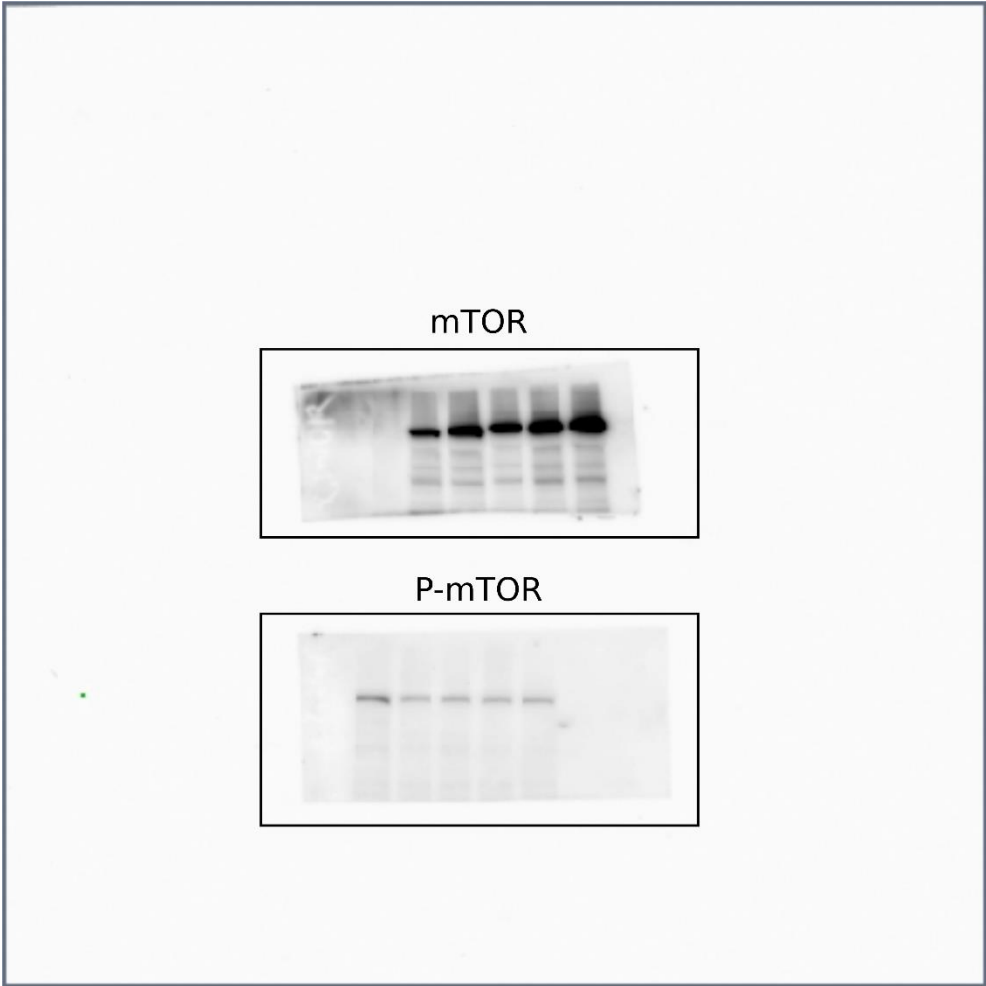

Full unedited gel for Figure 8B

GAPDH

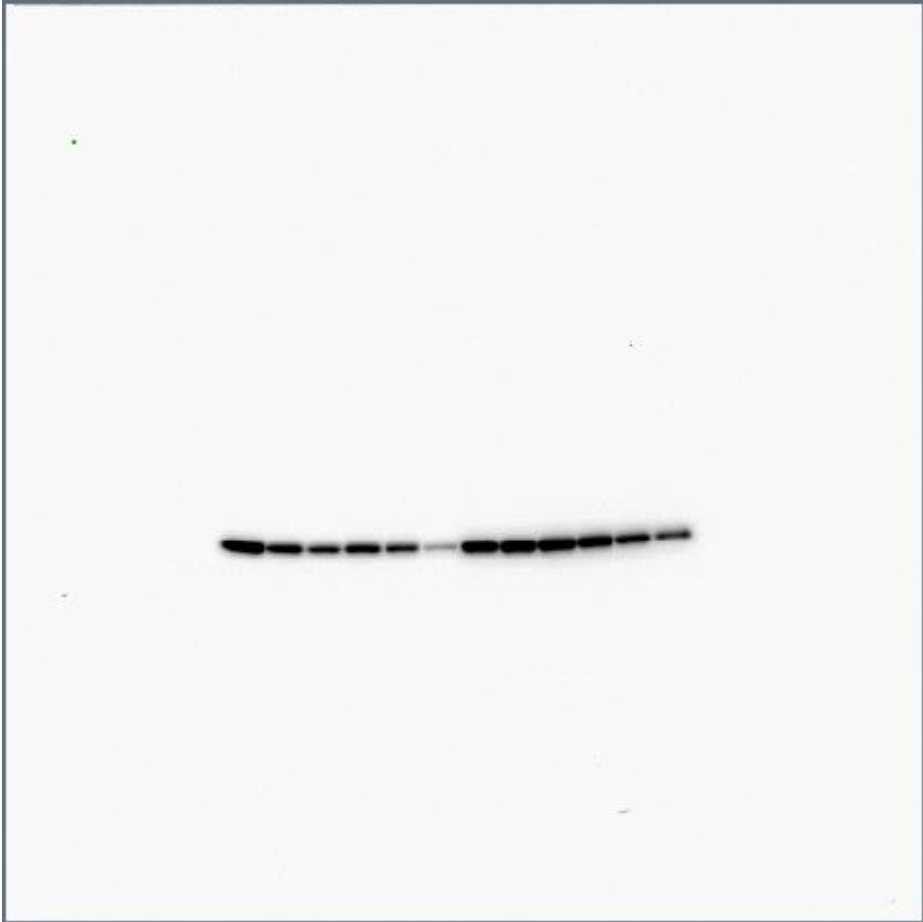

Full unedited gel for Figure 8B

PGI

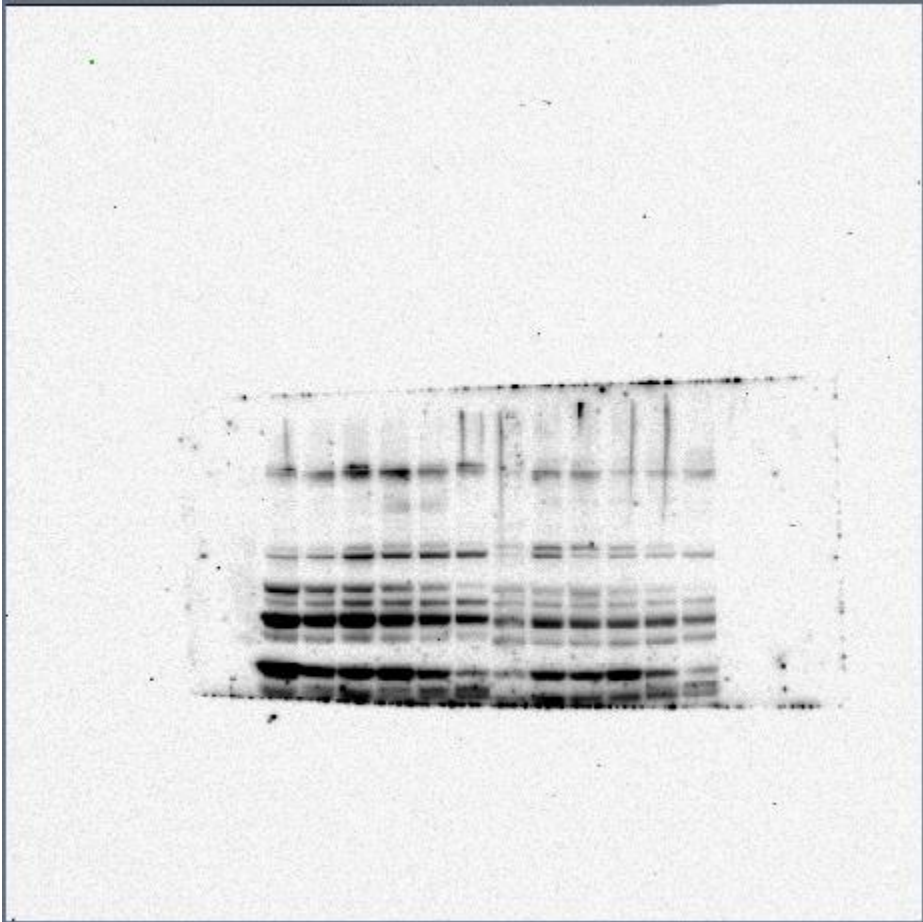

Full unedited gel for Figure 8C

P-mTOR

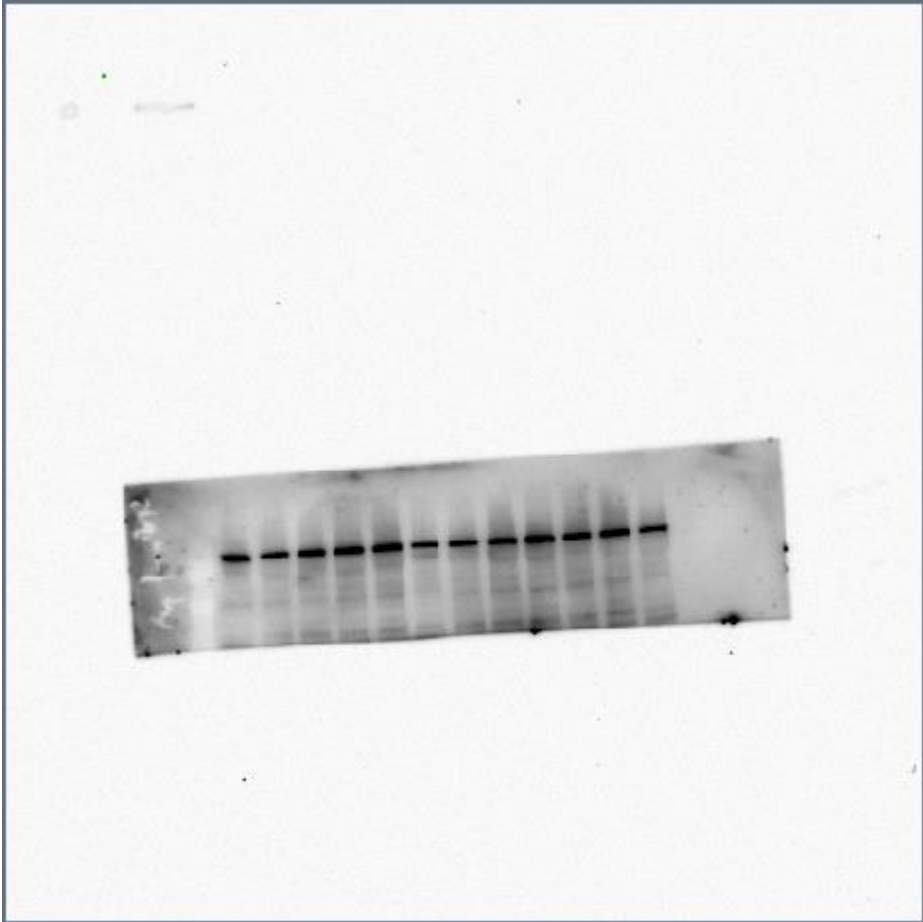



Full unedited gel for Figure 8C

mTOR

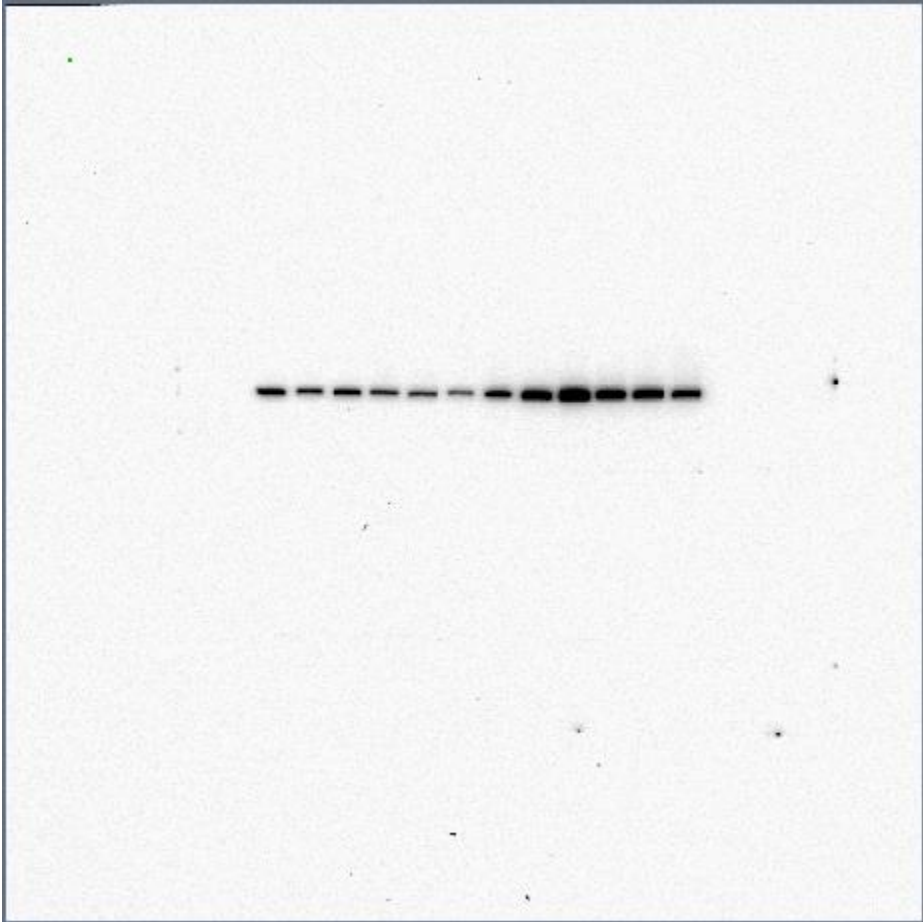

Full unedited gel for Figure 8C

GAPDH

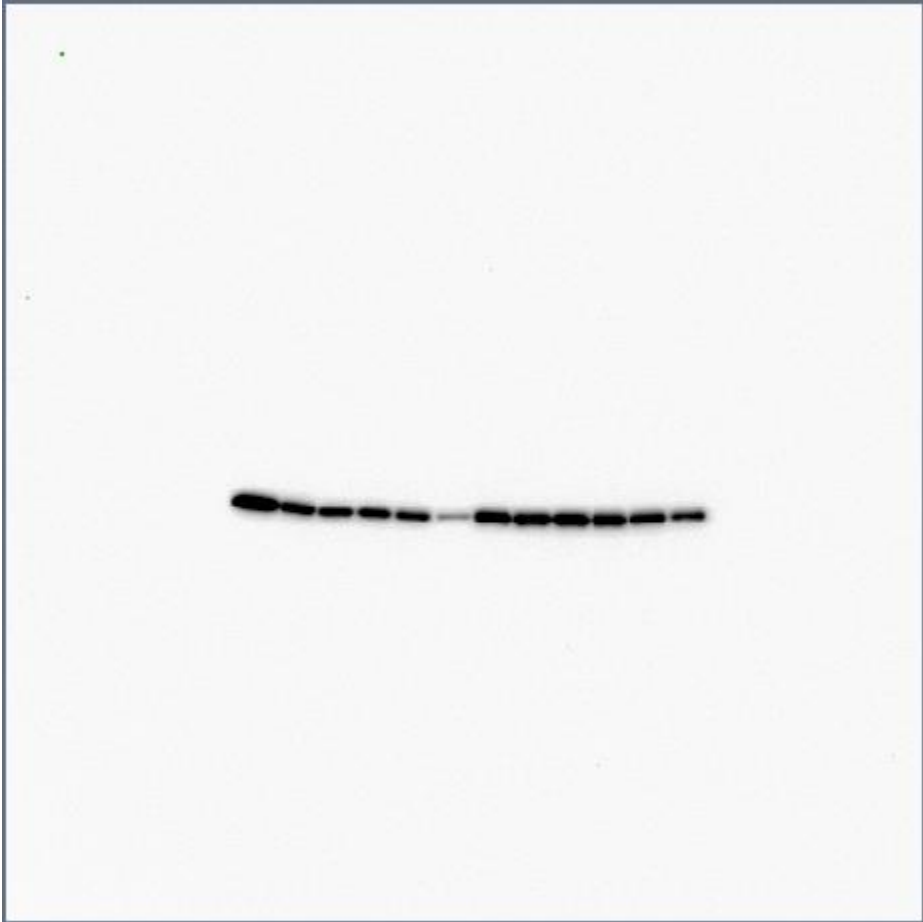

**Full unedited gel for Figure 8D**

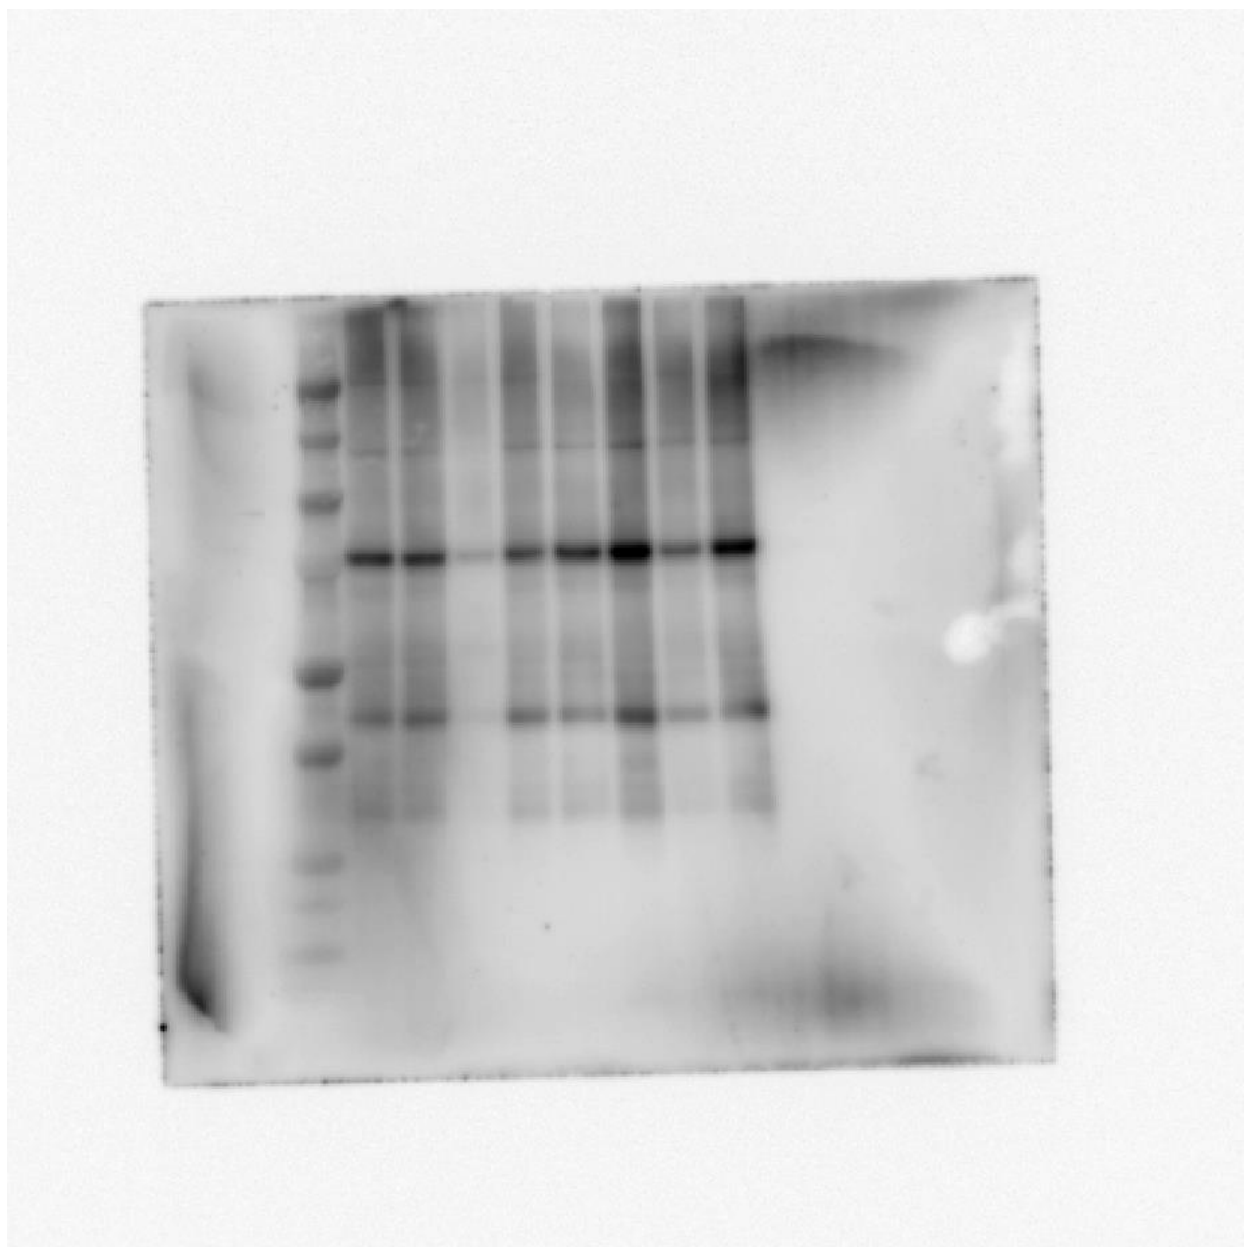

Supplement: NIHMS1549120-supplement-31518_Unedited_Figure_Gels.pdf [file NIHMS1549120-supplement-31518_Unedited_Figure_Gels.pdf]
