# Supplementary material
Source: PubMed Central journal article supplement (PMC7048004)
Supplement: NIHMS1549120-supplement-315180_Acknowledgement_Permissions.pdf [file NIHMS1549120-supplement-315180_Acknowledgement_Permissions.pdf]

## CIRCRES/2019/315180R2: Glucose 6-phosphate accumulates via phosphoglucose isomerase inhibition in heart muscle

 Hanna Shanar <hashanar@gmail.com>  
To: CircRes@circresearch.org; Cc: Karlstaedt, Anja; ↵

 Reply all | ▾

Mon 10/14/2019 11:35 AM

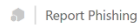 Report Phishing 

\*\*\*\* EXTERNAL EMAIL \*\*\*\*

To Whom it may concern:

I have seen the version of the manuscript to be submitted/published and I hereby give my consent for my name to be included in the acknowledgement section in the manuscript CIRCRES/2019/315180R2 titled "Glucose 6-phosphate accumulates via phosphoglucose isomerase inhibition in heart muscle" for consideration of publication in Circulation Research. I understand that this email is evidence of my consent.

I understand that this manuscript may be published in Circulation Research (both in print and electronically) and in products derived from the journals. As a result, I understand that the material may be seen by the general public. I understand that I may revoke consent at any time before publication, but once the information has been published revocation of the consent is no longer possible. I understand that I will derive no financial benefit from publication of this paper.

Sincerely,

Hanna Shanar

## RE: CIRCRES/2019/315180R2: Glucose 6-phosphate accumulates via phosphoglucose isomerase inhibition in heart muscle

 Jiries Ganim <ganim@usc.edu>  
To: CircRes@circresearch.org; Cc: Karlstaedt, Anja; ↵

 Reply all | ▾

Mon 10/14/2019 11:36 AM

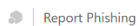 Report Phishing 

\*\*\*\* EXTERNAL EMAIL \*\*\*\*

To Whom it may concern:

I have seen the version of the manuscript to be submitted/published and I hereby give my consent for my name to be included in the acknowledgement section in the manuscript CIRCRES/2019/315180R2 titled "Glucose 6-phosphate accumulates via phosphoglucose isomerase inhibition in heart muscle" for consideration of publication in Circulation Research. I understand that this email is evidence of my consent.

I understand that this manuscript may be published in Circulation Research (both in print and electronically) and in products derived from the journals. As a result, I understand that the material may be seen by the general public. I understand that I may revoke consent at any time before publication, but once the information has been published revocation of the consent is no longer possible. I understand that I will derive no financial benefit from publication of this paper.

Sincerely,

Jiries Ganim
